# Supplementary material
Source: PubMed Central journal article supplement (PMC4079278)

### Intra-subject Inter-adenoma Correlation

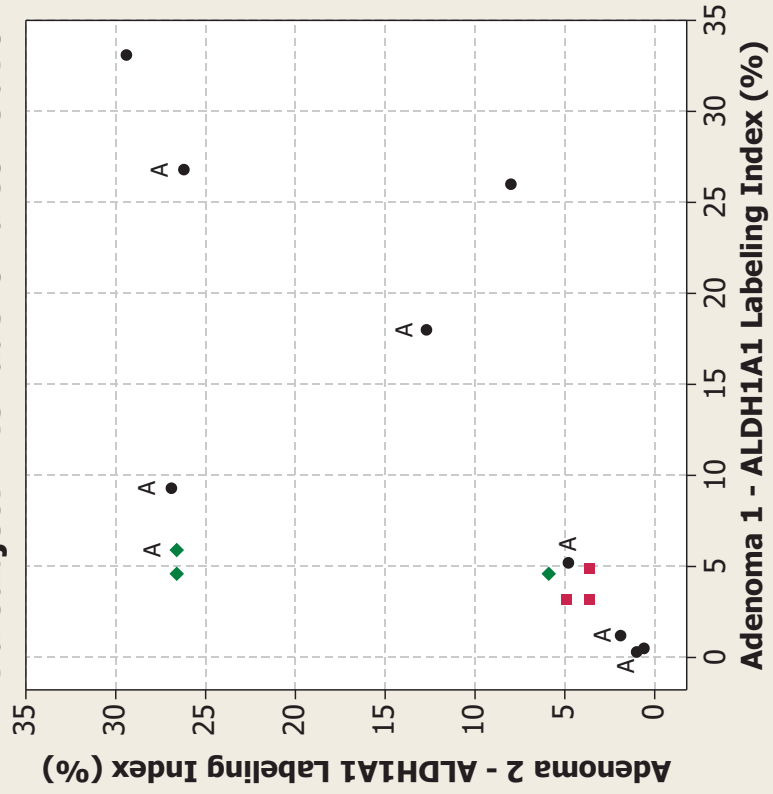

Supplement: NIHMS588304-supplement-supplemental_figure_2.pdf [file NIHMS588304-supplement-supplemental_figure_2.pdf]
